# Supplementary material
Source: publisher figshare collection journal article supplement (https://karger.figshare.com/ndownloader/files/38310906)
Supplement: Supplementary file 1 [file 38310906]

**S1. Institutional Review Board/Independent Ethics Committee Approval Information**

| **Country** | **Ethics Committee Address** | **Approval Number** |
| --- | --- | --- |
| ***Study 204*** | | |
| United Kingdom | London-City & East Research Ethics Committee Bristol Research Ethics Committee Center Whitefriars, Level 3, Block B, Lewins Mead Bristol, UK BS1 2NT | 235423 |
| United States | John Hopkins Medicine Office of Human Subjects Research 1620 McElderry St Reed Hall B130 Baltimore, MD USA 21205 | 20180406 |
| United States | Western Institutional Review Board (WIRB) 1019 39th Avenue Southeast Suite 120 Puyallup, Washington USA 98374 | 20180406 |
| United States | Western Institutional Review Board (WIRB) 1019 39th Avenue Southeast Suite 120 Puyallup, WA USA 98374-2115 | 20180406 |
| United States | NYU Grossman School of Medicine IRB 360 Park Avenue South 10th Floor New York, NY USA 10016 | 20180406 |
| United States | Columbia University Medical Center IRB 154 Haven Avenue, 1st Floor New York, NY USA 10032 | 20180406 |
| United States | Western Institutional Review Board (WIRB) 1019 39th Avenue SE Suite 120 Puyallup, Washington US 98374-2115 | 20180406 |
| ***Study 205*** | | |
| Australia | Melbourne Health Human Research Ethics Committee Office for Research, Royal Melbourne Hospital (City Campus) Level 2, South West, 300 Grattan Street Parkville, Victoria 3050 Australia | HREC/18/MH/3 |
| Belgium | Commissie voor Medische Ethiek ZNA Koningin Paola Kinderziekenhuis (P4-Route 34) Lindendreef 1 Antwerpen, Antwerpen Belgium 2020 | 5098 |
| Italy | Comitato Etico di Bergamo ASST Papa Giovanni XXIII Piazza Organizzazione Mondiale della Sanita, 1 Bergamo, BG Italy 24127 | 112/18 |
| Netherlands | Commissie Mensgebonden Onderzoek, regio Arnhem-Nijmegen Radboud University Medical Center Huispost 348 Postbus 9101 6500 HB Nijmegen Netherlands | 2018-4479 |
| Netherlands | Medisch-Ethische toetsingscommissie Leiden Den Haag Delft (METC LDD) Secretariaat METC-LDD Postzone P5-P Postbus 9600 2300 RC Leiden Netherlands | 2018-4479 |
| United States | University of Pennsylvania Institutional Review Board 3600 Civic Center Boulevard Philadelphia, PA USA 19104 | 20181141 |
| United States | Western Institutional Review Board 1019 39th Ave. SE Suite 120 Puyallup, WA USA 98374-2115 | 20181141 |
| United States | Yale University Human Research Protection Program 25 Science Park, 3rd Floor 150 Munson St, PO Box 208327 New Haven, CT USA 06520-8327 | 20181141 |
| United States | Western Institutional Review Board 1019 39th Ave. SE Suite 120 Puyallup, WA USA 98374 | 20181141 |
| United States | Ann & Robert H. Lurie Children’s Hospital of Chicago Institutional Review Board 225E. Chicago Ave., MB# 205 Chicago, IL USA 60611 | 20181141 |
